# Supplementary material for: A second-level diagonal preconditioner for single-step SNPBLUP
Source: PubMed Central journal article supplement (PMC6593613; doi:10.1186/s12711-019-0472-8), 2019-06-25
Supplement: 12711_2019_472_MOESM2_ESM.pdf [file 12711_2019_472_MOESM2_ESM.pdf]

## Additional file 2: Proof of the sufficient condition

Let the matrix  $\mathbf{C}$  be a coefficient matrix of ssSNPBLUP.

Let the matrix  $\mathbf{M}$  be a (block-)diagonal preconditioner associated with  $\mathbf{C}$ .

Let the matrix  $\tilde{\mathbf{C}}$  be a preconditioned coefficient matrix defined as  $\tilde{\mathbf{C}} = \mathbf{M}^{-1/2}\mathbf{C}\mathbf{M}^{-1/2}$ . The matrix  $\tilde{\mathbf{C}}$  can be partitioned between equations not associated with ( $O$ ) and associated with ( $S$ ) SNP effects as:

$$\tilde{\mathbf{C}} = \begin{bmatrix} \tilde{\mathbf{C}}_{OO} & \tilde{\mathbf{C}}_{OS} \\ \tilde{\mathbf{C}}_{SO} & \tilde{\mathbf{C}}_{SS} \end{bmatrix}.$$

Let the matrix  $\mathbf{D}$  be a diagonal matrix defined as

$$\mathbf{D} = \begin{bmatrix} k_O \mathbf{I}_{OO} & \mathbf{0} \\ \mathbf{0} & k_S \mathbf{I}_{SS} \end{bmatrix}$$

where  $\mathbf{I}_{OO}$  is an identity matrix of size equal to the number of equations that are not associated with the SNP effects,  $\mathbf{I}_{SS}$  is an identity matrix of size equal to the number of equations that are associated with the SNP effects, and  $k_O$  and  $k_S$  are real positive numbers.

Let the matrix  $\tilde{\mathbf{V}}$  be a matrix containing (columnwise) all the eigenvectors of  $\tilde{\mathbf{C}}$  sorted following the ascending order of their associated eigenvalues. The matrix  $\tilde{\mathbf{V}}$  can be partitioned into a matrix  $\tilde{\mathbf{V}}_1$  storing eigenvectors associated with eigenvalues at the left-hand side of the spectrum of  $\tilde{\mathbf{C}}$  (that includes the smallest eigenvalues) and a matrix  $\tilde{\mathbf{V}}_2$  storing eigenvectors at the right-hand side of the spectrum of  $\tilde{\mathbf{C}}$  (that includes the largest eigenvalues), and between equations not associated with and associated with SNP effects, as follows:

$$\tilde{\mathbf{V}} = [ \tilde{\mathbf{V}}_1 \quad \tilde{\mathbf{V}}_2 ] = \begin{bmatrix} \tilde{\mathbf{V}}_{O1} & \tilde{\mathbf{V}}_{O2} \\ \tilde{\mathbf{V}}_{S1} & \tilde{\mathbf{V}}_{S2} \end{bmatrix}.$$

### Sufficient condition

A sufficient condition to ensure that  $\lambda_{\min}(\mathbf{D}^{-1/2}\tilde{\mathbf{C}}\mathbf{D}^{-1/2}) = k_O^{-1}\lambda_{\min}(\tilde{\mathbf{C}})$ , is that  $\tilde{\mathbf{V}}_{S1} = \mathbf{0}$ ,  $\tilde{\mathbf{V}}_{O2} = \mathbf{0}$ , and that all eigenvalues associated with an eigenvector of  $\tilde{\mathbf{V}}_2$  are equal to, or larger than,  $\frac{k_S}{k_O}\lambda_{\min}(\tilde{\mathbf{C}})$ .

### Proof

This sufficient condition is proven in three steps.

First, if  $\tilde{\mathbf{V}}_{S1} = \mathbf{0}$ , it implies that each  $i^{th}$  eigenvalue associated with an eigenvector of  $\tilde{\mathbf{V}}_1$ , that is  $\lambda_{1_i}(\tilde{\mathbf{C}})$ , is proportional by a factor  $k_O$  to an eigenvalue of  $\mathbf{D}^{-1/2}\tilde{\mathbf{C}}\mathbf{D}^{-1/2}$ , that is  $\lambda_i(\mathbf{D}^{-1/2}\tilde{\mathbf{C}}\mathbf{D}^{-1/2}) = k_O^{-1}\lambda_{1_i}(\tilde{\mathbf{C}})$ , because:

$$\begin{aligned}\tilde{\mathbf{C}}\tilde{\mathbf{v}}_{1_i} = \lambda_{1_i}(\tilde{\mathbf{C}})\tilde{\mathbf{v}}_{1_i} &\iff \mathbf{D}^{-1/2}\tilde{\mathbf{C}}\tilde{\mathbf{v}}_{1_i} = \lambda_{1_i}(\tilde{\mathbf{C}})\mathbf{D}^{-1/2}\tilde{\mathbf{v}}_{1_i} \\ &\iff \mathbf{D}^{-1/2}\tilde{\mathbf{C}}\mathbf{D}^{-1/2}\mathbf{v}_i = \lambda_{1_i}(\tilde{\mathbf{C}})\mathbf{D}^{-1}\mathbf{v}_i \\ &\iff \mathbf{D}^{-1/2}\tilde{\mathbf{C}}\mathbf{D}^{-1/2}\mathbf{v}_i = k_O^{-1}\lambda_{1_i}(\tilde{\mathbf{C}})\mathbf{v}_i \\ &\iff \mathbf{D}^{-1/2}\tilde{\mathbf{C}}\mathbf{D}^{-1/2}\mathbf{v}_i = \lambda_i(\mathbf{D}^{-1/2}\tilde{\mathbf{C}}\mathbf{D}^{-1/2})\mathbf{v}_i\end{aligned}$$

where  $\tilde{\mathbf{v}}_{1_i}$  is a column of  $\tilde{\mathbf{V}}_1$ , that is an eigenvector associated with the eigenvalue  $\lambda_{1_i}(\tilde{\mathbf{C}})$ , and is equal to  $\tilde{\mathbf{v}}_{1_i} = \begin{bmatrix} \tilde{\mathbf{v}}_{O1_i} \\ \mathbf{0} \end{bmatrix}$ , and  $\tilde{\mathbf{v}}_{1_i} = \mathbf{D}^{-1/2}\mathbf{v}_i$ .

Therefore, it follows that the smallest eigenvalue of  $\mathbf{D}^{-1/2}\tilde{\mathbf{C}}\mathbf{D}^{-1/2}$  is proportional to  $\lambda_{1_i}(\tilde{\mathbf{C}})$ , that is  $\lambda_{1_{min}}(\mathbf{D}^{-1/2}\tilde{\mathbf{C}}\mathbf{D}^{-1/2})$ , is equal to the smallest eigenvalue of  $\tilde{\mathbf{C}}$ ,  $\lambda_{min}(\tilde{\mathbf{C}})$ , multiplied by  $k_O^{-1}$ , that is  $\lambda_{1_{min}}(\mathbf{D}^{-1/2}\tilde{\mathbf{C}}\mathbf{D}^{-1/2}) = k_O^{-1}\lambda_{min}(\tilde{\mathbf{C}})$ .

Second, if  $\tilde{\mathbf{V}}_{O2} = \mathbf{0}$ , it implies that each  $j^{th}$  eigenvalue associated with an eigenvector of  $\tilde{\mathbf{V}}_2$ , that is  $\lambda_{2_j}(\tilde{\mathbf{C}})$ , is proportional by a factor  $k_S$  to an eigenvalue of  $\mathbf{D}^{-1/2}\tilde{\mathbf{C}}\mathbf{D}^{-1/2}$ , that is  $\lambda_j(\mathbf{D}^{-1/2}\tilde{\mathbf{C}}\mathbf{D}^{-1/2}) = k_S^{-1}\lambda_{2_j}(\tilde{\mathbf{C}})$ , because:

$$\begin{aligned}\tilde{\mathbf{C}}\tilde{\mathbf{v}}_{2_j} = \lambda_{2_j}(\tilde{\mathbf{C}})\tilde{\mathbf{v}}_{2_j} &\iff \mathbf{D}^{-1/2}\tilde{\mathbf{C}}\mathbf{D}^{-1/2}\mathbf{v}_j = \lambda_{2_j}(\tilde{\mathbf{C}})\mathbf{D}^{-1}\mathbf{v}_j \\ &\iff \mathbf{D}^{-1/2}\tilde{\mathbf{C}}\mathbf{D}^{-1/2}\mathbf{v}_j = k_S^{-1}\lambda_{2_j}(\tilde{\mathbf{C}})\mathbf{v}_j \\ &\iff \mathbf{D}^{-1/2}\tilde{\mathbf{C}}\mathbf{D}^{-1/2}\mathbf{v}_j = \lambda_j(\mathbf{D}^{-1/2}\tilde{\mathbf{C}}\mathbf{D}^{-1/2})\mathbf{v}_j\end{aligned}$$

where  $\tilde{\mathbf{v}}_{2_j}$  is a column of  $\tilde{\mathbf{V}}_2$ , that is an eigenvector associated with the eigenvalue  $\lambda_{2_j}(\tilde{\mathbf{C}})$ , and is equal to  $\tilde{\mathbf{v}}_{2_j} = \begin{bmatrix} \mathbf{0} \\ \tilde{\mathbf{v}}_{S2_j} \end{bmatrix}$ , and  $\tilde{\mathbf{v}}_{2_j} = \mathbf{D}^{-1/2}\mathbf{v}_j$ .

Therefore, it follows that the smallest eigenvalue of  $\mathbf{D}^{-1/2}\tilde{\mathbf{C}}\mathbf{D}^{-1/2}$  is proportional to  $\lambda_{2_j}(\tilde{\mathbf{C}})$ , that is  $\lambda_{2_{min}}(\mathbf{D}^{-1/2}\tilde{\mathbf{C}}\mathbf{D}^{-1/2})$ , is equal to the smallest eigenvalue among all the eigenvalues associated with the eigenvectors included in  $\tilde{\mathbf{V}}_2$ ,  $\lambda_{2_{min}}(\tilde{\mathbf{C}})$ , multiplied by  $k_S^{-1}$ , that is  $\lambda_{2_{min}}(\mathbf{D}^{-1/2}\tilde{\mathbf{C}}\mathbf{D}^{-1/2}) = k_S^{-1}\lambda_{2_{min}}(\tilde{\mathbf{C}})$ .

Finally, from the two previous results, that is  $\lambda_{1_{min}}(\mathbf{D}^{-1/2}\tilde{\mathbf{C}}\mathbf{D}^{-1/2}) = k_O^{-1}\lambda_{min}(\tilde{\mathbf{C}})$ , and  $\lambda_{2_{min}}(\mathbf{D}^{-1/2}\tilde{\mathbf{C}}\mathbf{D}^{-1/2}) = k_S^{-1}\lambda_{2_{min}}(\tilde{\mathbf{C}})$ , the smallest eigenvalue of the spectrum of  $\mathbf{D}^{-1/2}\tilde{\mathbf{C}}\mathbf{D}^{-1/2}$ ,  $\lambda_{min}(\mathbf{D}^{-1/2}\tilde{\mathbf{C}}\mathbf{D}^{-1/2})$ , is equal to:

$$\begin{aligned}\lambda_{\min}(\mathbf{D}^{-1/2}\tilde{\mathbf{C}}\mathbf{D}^{-1/2}) &= \min\left(\lambda_{1_{\min}}(\mathbf{D}^{-1/2}\tilde{\mathbf{C}}\mathbf{D}^{-1/2}), \lambda_{2_{\min}}(\mathbf{D}^{-1/2}\tilde{\mathbf{C}}\mathbf{D}^{-1/2})\right) \\ &= \min\left(k_O^{-1}\lambda_{\min}(\tilde{\mathbf{C}}), k_S^{-1}\lambda_{2_{\min}}(\tilde{\mathbf{C}})\right)\end{aligned}$$

Therefore,  $\lambda_{\min}(\mathbf{D}^{-1/2}\tilde{\mathbf{C}}\mathbf{D}^{-1/2}) = k_O^{-1}\lambda_{\min}(\tilde{\mathbf{C}})$  if, and only if,  $\lambda_{2_{\min}}(\tilde{\mathbf{C}}) \geq \frac{k_S}{k_O}\lambda_{\min}(\tilde{\mathbf{C}})$ , or, in other words, if, and only if, all eigenvalues associated with an eigenvector of  $\tilde{\mathbf{V}}_2$  are equal to, or larger than,  $\frac{k_S}{k_O}\lambda_{\min}(\tilde{\mathbf{C}})$ .
